# Supplementary material for: Crystallization control of wide-bandgap perovskites for efficient solar cells via adding an anti-solvent into the perovskite precursor
Source: Royal Society of Chemistry journal article supplement (doi:10.1039/d3nr06615k), 2024-01-01
Supplement: d3nr06615k1.pdf [file d3nr06615k1.pdf]

## Supporting Information for

# **Crystallization control of wide-bandgap perovskite for efficient solar cells via adding an anti-solvent into the perovskite precursor**

Zhihai Liu,<sup>a</sup> Lei Wang,<sup>b</sup> Xi Liu,<sup>a</sup> Xiaoyin Xie<sup>c,\*</sup> and Ping Chen<sup>a,\*\*</sup>

<sup>a</sup>School of Physics and Electronic Information, Yantai University, Yantai 264005, China, *Email:* [chenping@ytu.edu.cn](mailto:chenping@ytu.edu.cn)

<sup>b</sup>School of Artificial Intelligence, Beijing Technology and Business University, Beijing, 100048, China

<sup>c</sup>School of Chemistry and Chemical Technology, Hubei Polytechnic University, Huangshi 435003, China, *Email:* [xyxie@hbpu.edu.cn](mailto:xyxie@hbpu.edu.cn)

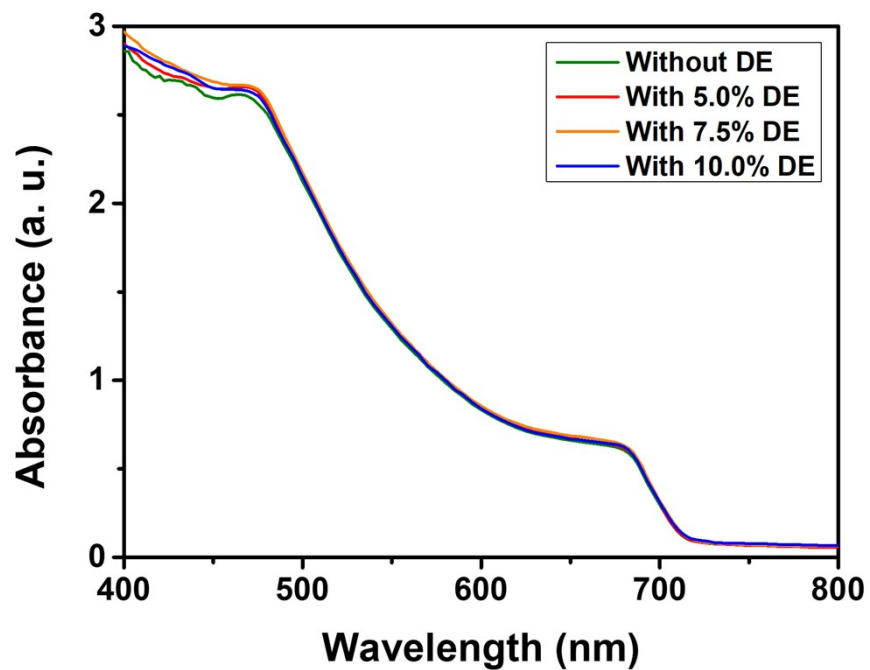

Figure S1. UV-vis absorption spectrum of the  $\text{Cs}_{0.12}\text{MA}_{0.05}\text{FA}_{0.83}\text{Pb}(\text{I}_{0.6}\text{Br}_{0.4})_3$  perovskite films prepared without and with different amounts of DE.

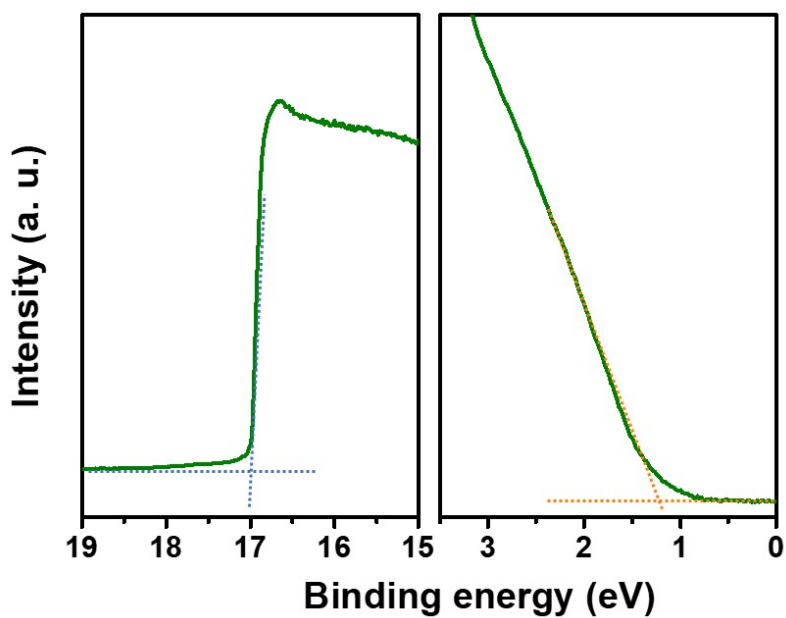

Figure S2. UPS spectra of the  $\text{Cs}_{0.12}\text{MA}_{0.05}\text{FA}_{0.83}\text{Pb}(\text{I}_{0.6}\text{Br}_{0.4})_3$  perovskite films.

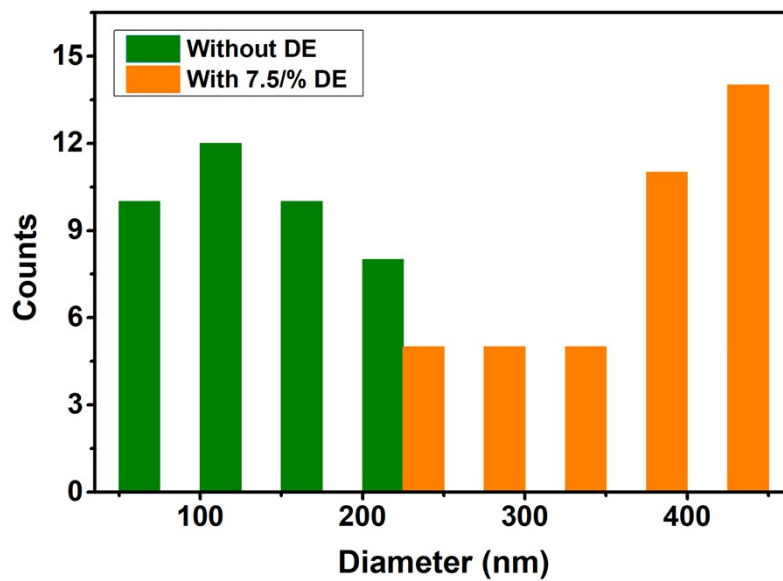

Figure S3. Statistical diameter histograms for the perovskite grains processed without and with 7.5% DE.

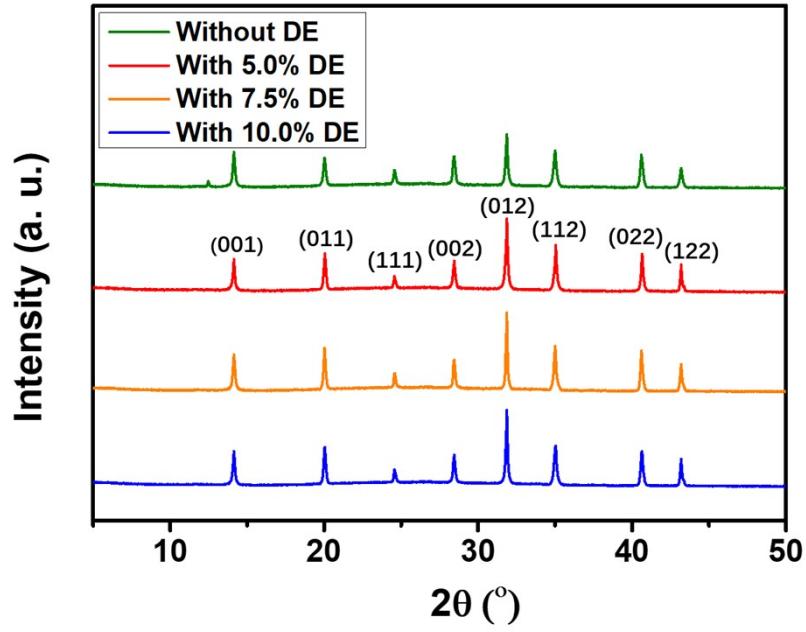

Figure S4. XRD patterns of the perovskite films prepared from precursors without and with different amount of DE.

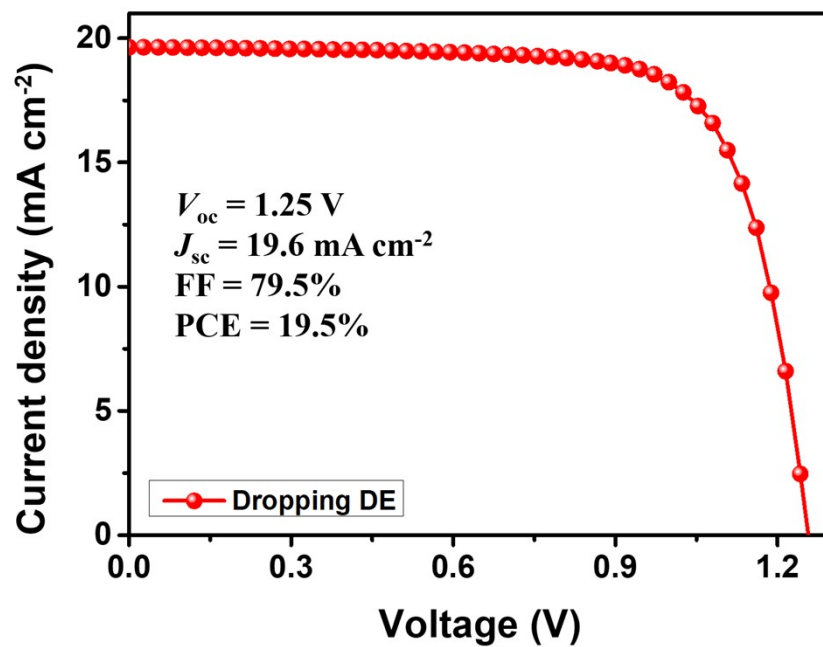

Figure S5.  $J$ - $V$  characteristics for PSCs with dropping DE onto the surface of the samples during spin-coating process.

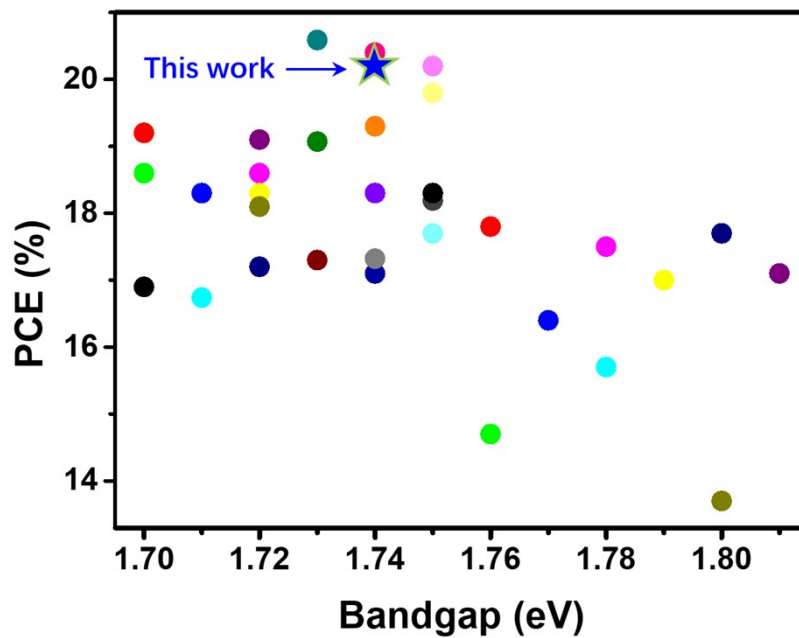

Figure S6. PCE distribution of recently reported wide-bandgap PSCs with bandgaps between 1.70 to 1.81 eV.

Table S1. Recently reported PCEs for wide-bandgap (1.70–1.81 eV) PSCs.

| No. | Bandgap (eV) | PCE (%) | Reference        |
|-----|--------------|---------|------------------|
| 1   | 1.70         | 16.9    | [1]              |
| 2   | 1.70         | 19.2    | [2]              |
| 3   | 1.70         | 18.6    | [3]              |
| 4   | 1.71         | 18.3    | [4]              |
| 5   | 1.71         | 16.74   | [5]              |
| 6   | 1.72         | 18.6    | [6]              |
| 7   | 1.72         | 18.3    | [7]              |
| 8   | 1.72         | 18.1    | [8]              |
| 9   | 1.72         | 17.2    | [9]              |
| 10  | 1.72         | 19.1    | [10]             |
| 11  | 1.73         | 17.3    | [11]             |
| 12  | 1.73         | 19.07   | [12]             |
| 13  | 1.73         | 20.59   | [13]             |
| 14  | 1.74         | 17.1    | [14]             |
| 15  | 1.74         | 19.3    | [1]              |
| 16  | 1.74         | 20.1    | <i>This work</i> |
| 17  | 1.74         | 18.3    | [15]             |
| 18  | 1.74         | 20.37   | [16]             |
| 19  | 1.74         | 20.2    | [17]             |
| 20  | 1.74         | 17.32   | [18]             |
| 21  | 1.75         | 19.8    | [19]             |
| 22  | 1.75         | 17.7    | [20]             |
| 23  | 1.75         | 20.2    | [21]             |
| 24  | 1.75         | 18.19   | [22]             |
| 25  | 1.75         | 18.3    | [23]             |
| 26  | 1.76         | 14.7    | [24]             |
| 27  | 1.76         | 17.8    | [25]             |
| 28  | 1.77         | 16.4    | [26]             |
| 29  | 1.78         | 15.7    | [1]              |
| 30  | 1.78         | 17.5    | [27]             |
| 31  | 1.79         | 17.0    | [28]             |
| 32  | 1.80         | 13.7    | [29]             |
| 33  | 1.80         | 17.7    | [30]             |
| 34  | 1.81         | 17.1    | [31]             |

## Reference

- [1] H. Tan, F. Che, M. Wei, Y. Zhao, M. I. Saidaminov, P. Todorović, D. Broberg, G. Walters, F. Tan, T. Zhuang, B. Sun, Z. Liang, H. Yuan, E. Fron, J. Kim, Z. Yang, O. Voznyy, M. Asta, E. H. Sargent. *Nat. Commun.*, **2018**, 9, 3100.
- [2] A. F. Palmstrom, G. E. Eperon, T. Leijtens, R. Prasanna, S. N. Habisreutinger, W. Nemeth, E. A. Gaubling, S. P. Dunfield, M. Reese, S. Nanayakkara, T. Moot, J. Werner, J. Liu, B. To, S. T. Christensen, M. D. McGehee, M. F. a. M. Van Hest, J. M. Luther, J. J. Berry, D. T. Moore. *Joule*, **2019**, 3, 2193.
- [3] B. Chen, Z. Yu, K. Liu, X. Zheng, Y. Liu, J. Shi, D. Spronk, P. N. Rudd, Z. Holman, J. Huang. *Joule*, **2019**, 3, 177.
- [4] Y. Lin, B. Chen, F. Zhao, X. Zheng, Y. Deng, Y. Shao, Y. Fang, Y. Bai, C. Wang, J. Huang. *Adv. Mater.*, **2017**, 29, 1700607.
- [5] D. B. Khadka, Y. Shirai, M. Yanagida, T. Noda, K. Miyano. *ACS Appl. Mater. Interfaces*, **2018**, 10, 22074.
- [6] Y. Zhou, Y.-H. Jia, H.-H. Fang, M. A. Loi, F.-Y. Xie, L. Gong, M.-C. Qin, X.-H. Lu, C.-P. Wong, N. Zhao. *Adv. Funct. Mater.*, **2018**, 28, 1803130.
- [7] Z. Liu, J. Siekmann, B. Klingebiel, U. Rau, T. Kirchartz. *Adv. Energy Mater.*, **2021**, 11, 2003386.
- [8] Y. Zhou, F. Wang, Y. Cao, J.-P. Wang, H.-H. Fang, M. A. Loi, N. Zhao, C.-P. Wong. *Adv. Energy Mater.*, **2017**, 7, 1701048.
- [9] Z. Wang, Q. Lin, F. P. Chmiel, N. Sakai, L. M. Herz, H. J. Snaith. *Nat. Energy*, **2017**, 2, 17135.
- [10] T. Duong, H. Pham, Y. Yin, J. Peng, M. A. Mahmud, Y. Wu, H. Shen, J. Zheng, T. Tran-Phu, T. Lu, L. Li, A. Kumar, G. G. Andersson, A. Ho-Baillie, Y. Liu, T. White, K. Weber, K. Catchpole. *J. Mater. Chem. A*, **2021**, 9, 18454.
- [11] T. Duong, Y. Wu, H. Shen, J. Peng, X. Fu, D. Jacobs, E.-C. Wang, T. C. Kho, K. C. Fong, M. Stocks, E. Franklin, A. Blakers, N. Zin, K. McIntosh, W. Li, Y.-B. Cheng, T. P. White, K. Weber, K. Catchpole. *Adv. Energy Mater.*, **2017**, 7, 1700228.
- [12] C. Chen, Z. Song, C. Xiao, R. A. Awni, C. Yao, N. Shrestha, C. Li, S. S. Bista, Y. Zhang, L. Chen, R. J. Ellingson, C.-S. Jiang, M. Al-Jassim, G. Fang, Y. Yan. *ACS Energy Lett.*, **2020**, 5, 2560.
- [13] L. Tao, X. Du, J. Hu, S. Wang, C. Lin, Q. Wei, Y. Xia, G. Xing, Y. Chen. *Sci. China Chem.*, **2022**, 65, 1650.
- [14] D. P. Mcmeekin, G. Sadoughi, W. Rehman, G. E. Eperon, M. Saliba, M. T. Hörantner, A. Haghighirad, N. Sakai, L. Korte, B. Rech, M. B. Johnston, L. M. Herz, H. J. Snaith. *Science*, **2016**, 351, 151.
- [15] T. Duong, H. Pham, T. C. Kho, P. Phang, K. C. Fong, D. Yan, Y. Yin, J. Peng, M. A. Mahmud, S. Gharibzadeh, B. A. Nejjand, I. M. Hossain, M. R. Khan, N. Mozaffari, Y. Wu, H. Shen, J. Zheng, H. Mai, W. Liang, C. Samundsett, M.



- Stocks, K. Mcintosh, G. G. Andersson, U. Lemmer, B. S. Richards, U. W. Paetzold, A. Ho-Ballie, Y. Liu, D. Macdonald, A. Blakers, J. Wong-Leung, T. White, K. Weber, K. Catchpole. *Adv. Energy Mater.*, **2020**, 10, 1903553.
- [16] L. Liu, Y. Yang, M. Du, Y. Cao, X. Ren, L. Zhang, H. Wang, S. Zhao, K. Wang, S. Liu. *Adv. Energy Mater.*, **2023**, 13, 2202802.
- [17] Z. Liu, L. Wang, X. Xie, C. Xu, C. Zhang and P. Chen, *J. Mater. Chem. C*, 2023, **11**, 15898.
- [18] X. Huo, Y. Li, Y. Lu, J. Dong, Y. Zhang, S. Zhao, B. Qiao, D. Wei, D. Song, Z. Xu. *J. Phys. Chem. C*, **2022**, 126, 1711.
- [19] S. Gharibzadeh, B. Abdollahi Nejang, M. Jakoby, T. Abzieher, D. Hauschild, S. Moghadamzadeh, J. A. Schwenzer, P. Brenner, R. Schmager, A. A. Haghighirad, L. Weinhardt, U. Lemmer, B. S. Richards, I. A. Howard, U. W. Paetzold. *Adv. Energy Mater.*, **2019**, 9, 1803699.
- [20] Y. Yu, C. Wang, C. R. Grice, N. Shrestha, D. Zhao, W. Liao, L. Guan, R. A. Awni, W. Meng, A. J. Cimaroli, K. Zhu, R. J. Ellingson, Y. Yan. *ACS Energy Lett.*, **2017**, 2, 1177.
- [21] M. A. Mahmud, J. Zheng, S. Tang, G. Wang, J. Bing, A. D. Bui, J. Qu, L. Yang, C. Liao, H. Chen, S. P. Bremner, H. T. Nguyen, J. Caine, A. W. Y. Ho-Baillie. *Adv. Energy Mater.*, **2022**, 22, 2201672.
- [22] C. Chen, Z. Song, C. Xiao, D. Zhao, N. Shrestha, C. Li, G. Yang, F. Yao, X. Zheng, R. J. Ellingson, C.-S. Jiang, M. Al-Jassim, K. Zhu, G. Fang, Y. Yan. *Nano Energy*. **2019**, 61, 141.
- [23] Z. Li, J. Zhang, S. Wu, X. Deng, F. Li, D. Liu, C. C. Lee, F. Lin, D. Lei, C.-C. Chueh, Z. Zhu, A. K. Y. Jen. *Nano Energy*. **2020**, 78, 105377.
- [24] S. Chen, Y. Hou, H. Chen, X. Tang, S. Langner, N. Li, T. Stubhan, I. Levchuk, E. Gu, A. Osvet, C. J. Brabec. *Adv. Energy Mater.*, **2018**, 8, 1701543.
- [25] Y.-H. Chiang, K. Frohna, H. Salway, A. Abfalterer, L. Pan, B. Roose, M. Anaya, S. D. Stranks. *ACS Energy Lett.*, **2023**, 8, 2728.
- [26] K. Xiao, R. Lin, Q. Han, Y. Hou, Z. Qin, H. T. Nguyen, J. Wen, M. Wei, V. Yeddu, M. I. Saidaminov, Y. Gao, X. Luo, Y. Wang, H. Gao, C. Zhang, J. Xu, J. Zhu, E. H. Sargent, H. Tan. *Nat. Energy*, **2020**, 5, 870.
- [27] M. Abdi-Jalebi, Z. Andaji-Garmaroudi, S. Cacovich, C. Stavrakas, B. Philippe, J. M. Richter, M. Alsari, E. P. Booker, E. M. Hutter, A. J. Pearson, S. Lilliu, T. J. Savenije, H. Rensmo, G. Divitini, C. Ducati, R. H. Friend, S. D. Stranks. *Nature*, **2018**, 555, 497.

- [28] R. D. J. Oliver, P. Caprioglio, F. Peña-Camargo, L. R. V. Buizza, F. Zu, A. J. Ramadan, S. G. Motti, S. Mahesh, M. M. McCarthy, J. H. Warby, Y.-H. Lin, N. Koch, S. Albrecht, L. M. Herz, M. B. Johnston, D. Neher, M. Stolterfoht, H. J. Snaith. *Energy Environ. Sci.*, **2022**, 15, 714.
- [29] X. Hu, X.-F. Jiang, X. Xing, L. Nian, X. Liu, R. Huang, K. Wang, H.-L. Yip, G. Zhou. *Solar RRL*, **2018**, 2, 1800083.
- [30] J. Wen, Y. Zhao, Z. Liu, H. Gao, R. Lin, S. Wan, C. Ji, K. Xiao, Y. Gao, Y. Tian, J. Xie, C. J. Brabec, H. Tan. *Adv. Mater.*, **2022**, 34, 2110356.
- [31] Y.-M. Xie, Z. Zeng, X. Xu, C. Ma, Y. Ma, M. Li, C.-S. Lee, S.-W. Tsang. *Small*, **2020**, 16, 1907226.
